1           **Dorsal striatal dopamine induces fronto-cortical hypoactivity and implies**  
2                           **reduced anxiety and compulsive behaviors in rats**

3  
4   **Authors:** Agata Casado-Sainz<sup>1</sup>†, Frederik Gudmundsen<sup>1</sup>†, Simone L. Baerentzen<sup>1</sup>, Denise  
5 Lange<sup>2</sup>, Annemette Ringsted<sup>1</sup>, Isabel Martinez-Tajada<sup>1</sup>, Siria Medina<sup>1</sup>, Hedok Lee<sup>3</sup>, Claus  
6 Svarer<sup>1</sup>, Sune H. Keller<sup>4</sup>, Martin Schain<sup>1</sup>, Celia Kjaerby<sup>5</sup>, Patrick M. Fisher<sup>1</sup>, Paul Cumming<sup>6,7</sup>,  
7 Mikael Palner<sup>1,8,9\*</sup>

8  
9 Agata.Casado@nru.dk, frederik.gudmundsen@nru.dk, slb@clin.au.dk, Denise.Lange@dlr.de,  
10 annemetteringsted@gmail.com, imate@elektro.dtu.dk, siriamedinaa@gmail.com,  
11 hedoklee@gmail.com, Claus.Svarer@nru.dk, Sune.Hoegild.Keller@regionh.dk,  
12 Martin.Schain@nru.dk, celia.kjaerby@sund.ku.dk, patrick.fisher@nru.dk,  
13 paul.k.cumming@gmail.com, mikael.palner@nru.dk  
14

15   **Affiliations:**

16   <sup>1</sup> Neurobiology Research Unit, Copenhagen University Hospital, Copenhagen, Denmark

17   <sup>2</sup> Institute of Aerospace Medicine, German Aerospace Center (DLR), Cologne, Germany.

18   <sup>3</sup> Department of Anesthesiology and Pediatric Anesthesiology, Yale University, New Haven, CT,  
19 United States

20   <sup>4</sup> Department of Clinical Physiology, Nuclear Medicine and PET, Copenhagen University  
21 Hospital, Copenhagen, Denmark

22   <sup>5</sup> Center for Translational Neuromedicine, University of Copenhagen, Copenhagen, Denmark

23   <sup>6</sup> Department of Nuclear Medicine, Inselspital, Bern University, Bern, Switzerland

24   <sup>7</sup> School of Psychology and Counselling, Queensland University of Technology, Brisbane,  
25 Australia

26   <sup>8</sup> Clinical Physiology and Nuclear Medicine, Department of Clinical Research, University of  
27 Southern Denmark, Odense, Denmark

28   <sup>9</sup> Department of Nuclear Medicine, Odense University Hospital, Odense, Denmark  
29

30   † These authors contributed equally to the publication

31   \* Corresponding author, [mikael.palner@nru.dk](mailto:mikael.palner@nru.dk)

32 Neurobiology Research Unit

33 6-8 Inge Lehmanns Vej

34 Rigshospitalet, build. 8057

35 DK-2100 Copenhagen, Denmark

36 Phone: +45 9399 6712

37

1 **One Sentence Summary:** Dorsal striatum dopamine induce fronto-cortical hypoactivity and  
2 reduce compulsive behaviors in rats

3

4 **Abstract:**

5 Dorsal striatal dopamine transmission engages the cortico-striato-thalamo-cortical (CSTC) circuit,  
6 which is implicated in many neuropsychiatric diseases, including obsessive-compulsive disorder  
7 (OCD). Yet it is unknown if dorsal striatal dopamine hyperactivity is the cause or consequence of  
8 changes elsewhere in the CSTC circuit. Classical pharmacological and neurotoxic manipulations  
9 of the CSTC and other brain circuits suffer from various drawbacks related to off-target effects  
10 and adaptive changes. Chemogenetics, on the other hand, enables a highly selective targeting of  
11 specific neuronal populations within a given circuit. In this study, we developed a chemogenetic  
12 method for selective activation of dopamine neurons in the substantia nigra, which innervating the  
13 rat dorsal striatum. We used this model to investigate effects of targeted dopamine activation on  
14 CSTC circuit function, especially in fronto-cortical regions. We found that chemogenetic  
15 activation of these neurons increased movement, as expected from dopamine release, rearings and  
16 time spend in center, while it also lowered self-grooming and increased prepulse inhibition in  
17 females. Remarkably, we observed reduced [<sup>18</sup>F]FDG metabolism in frontal cortex, following  
18 dopamine activation in the dorsal striatum, yet total glutamate levels- in this region were increased.  
19 A finding which may help explain the contradiction in some clinical studies of increased [<sup>18</sup>F]FDG  
20 metabolism and lower glutamate levels in diseases like OCD. Taken together, these results  
21 establish the importance of nigro-striatal dopamine transmission for modulating CSTC function,  
22 especially with respect to fronto-cortical activity, glutamate levels and behaviors related anxiety  
23 and compulsive actions.

24

25

## 1 **Introduction**

2 Real progress in the development of therapeutic approaches for a range of neuropsychiatric  
3 disorder has been stalled for years. One reason is likely due to the lack of causal whole brain  
4 analysis of functional circuits, which are usually done for one region or projection at the time. We  
5 set out to discover how manipulation of one dopaminergic projection affects changes throughout  
6 the cortico-striato-thalamo-cortical (CSTC) circuit using *in vivo* whole-brain imaging and  
7 chemogenetics.

8  
9 The CSTC circuit relays cortical activity, through the striatum, midbrain and thalamus back to the  
10 cortex. Cortical pyramidal neurons project to the dorsal striatum, where spiny projection neurons  
11 (SPN) then subserve an integration of direct (go) or indirect (no-go) output pathways that relay  
12 signals to the thalamus via the substantia nigra pars reticulata (SNr). The thalamus then  
13 communicates the processed signal back to frontal cortex to complete the circuit [2,6]. The activity  
14 of the CSTC circuit is modulated by nigro-striatal dopamine projections to the dorsal striatum.  
15 Changes in striatal dopaminergic activity have been linked to perturbations of cognitive functions  
16 in multiple neuropsychiatric or neurodegenerative diseases [1] such as obsessive compulsive  
17 disorder (OCD) [2] and schizophrenia [3]. While showing distinct phenomenologies, these  
18 conditions have overlapping behavioral phenotypes, including obsessions, compulsions, and  
19 sensory gating deficits, which are linked to altered dopaminergic transmission within the striatum  
20 [4,5].

21  
22 Molecular imaging studies by positron emission tomography (PET) in people with OCD have  
23 shown changes in striatal dopamine receptor availability [5], metabolic hyperactivity especially in  
24 the orbito-frontal cortex (OFC), and increased metabolic connectivity from frontal cortex to the  
25 caudate [7–10], which is the equivalent of the medial dorsal striatum (mDS) in rodents [11]. MR  
26 spectroscopy studies of such individuals have shown relatively reduced total glutamate+glutamine  
27 (Glx) and N-acetylaspartate levels in fronto-cortical regions [12–14]. These clinical imaging  
28 studies suggest the presence of a phenotype of abnormal CSTC circuit activity in OCD, although  
29 it is difficult to establish causal relationships based on clinical imaging without direct targeting of  
30 specific neuronal pathways. As such, it is unclear if altered striatal dopamine function is a driver  
31 for or rather a consequence of fronto-cortical dysfunction in neuropsychiatric disease.

32  
33 Classical neurochemical approaches to modulate activity within the rodent CSTC include  
34 neurochemical lesions [15,16], and focal stereotaxic drug injections [17]. These chronic methods,  
35 in varying degrees, bring unintended perturbations or adaptive changes of the nervous system.  
36 Chemogenetics, on the other hand, enables a highly selective targeting of specific neuronal  
37 populations within a given circuit. In this study, we applied a selective retrograde chemogenetic  
38 transduction of the medial dorsal striatum (mDS) dopamine projections arising from the medial  
39 substantia nigra pars compacta (mSNpc). Using this model, we studied the effects of selective  
40 nigro-striatal dopamine activation on behavioral, and whole-brain CSTC circuit function in the

1 rodent brain. The combination of [<sup>18</sup>F]FDG PET and MR Spectroscopy gives valuable knowledge  
2 highly needed in order to interpret clinical neuroimaging findings in psychiatric disorders, and  
3 suggest that the combination of these using PET/MR technology in patients may increase our  
4 understanding of such disorders. We show that there is a causal relationship between increased  
5 dorsal striatum dopamine and fronto-cortical hypoactivity, yet unexpectedly also an increase in  
6 total glutamate levels. At the same time, dopamine activity in the dorsal striatum led to increased  
7 locomotion, increase exploratory and anxiolytic effects, and a change in behavioral measures  
8 related to CSTC circuit function and compulsive actions, lower self-grooming, lower startle  
9 response and increased prepulse-inhibition of the startle response in females. These results in  
10 otherwise behaviorally normal rats support the formulation of a novel hypothesis that potentiating  
11 dopaminergic activity specifically in mDS will reduce anxiety and compulsive-like behavioral  
12 symptoms which are related to hypercortical activity, like those present in disorders such as OCD.

13

## 14 **Materials and Methods**

### 15 *Animals*

16 Long Evans TH:Cre rats (LE Tg(TH:Cre 3.1)Deis) were purchased from the Rat Resource and  
17 Research Center (RRRC, University of Missouri). This strain carries a transgene containing a Cre  
18 recombinase inserted immediately before the start codon of the tyrosine hydroxylase gene (Witten  
19 et al. 2011). Both male (♂ = ▲) and female (♀ = ▼) animal were used. Additional information of  
20 breeding and ethics is located in the supplementary materials.

### 21 *Statistics*

22 Results are analyzed in GraphPad using a two-way ANOVA (behavioral experiments) or mixed  
23 effects model (PET and MRS) analysis with repeated measure where appropriate with adjustment  
24 for multiple comparisons. We report general effects of sex, treatment or vector injection with  
25 significance (P) and degrees of freedom (F), while mixed effects models are noted with t-value  
26 and DF. Individual group differences are noted only with respect to significance (P). Standard  
27 deviations (SD) are reported throughout the results and figures. Significance is reported as \*\*\*\*  
28 P<0.0001, \*\*\* P<0.001, \*\* P<0.01, \* P<0.05.

### 29 *Retrograde chemogenetic transduction of dopaminergic projections in rats and mice*

30 Adult TH:Cre rats (250 g) rats were anesthetized with 3% isoflurane (vol/vol) in oxygen and placed  
31 into a stereotactic frame (Kopf Instruments, Tujunga, CA, USA). Anesthesia was maintained with  
32 1.5– 2% isoflurane; breathing, pain reflex, and body temperature was monitored throughout  
33 surgery. The scalp was shaved and disinfected with successive swabs soaked in 70% iodine,  
34 ethanol, and 0.1% lidocaine. An incision was then made down the midline of the scalp, the skull  
35 was exposed, and burr holes were drilled above the target regions. The DREADD (mDS-  
36 DREADD: AAV6-hSyn-DIO-mCherry-hM3D(Gq)-WPRE) (hM3Dq) and mCherry (mDS-

1 mCherry: AAV6-hSyn-DIO-mCherry-WPRE) carrying viral vectors (described in detail in the  
2 supplementary materials) were injected bilaterally in the mDS at two locations in each hemisphere  
3 (2  $\mu$ L per location) (AP +1.1 mm, ML  $\pm$  2.5 mm, DV -5 mm and -6 mm), via a 10  $\mu$ l Nanofil  
4 syringe and 33GA beveled needle (World Precision Instruments, Sarasota, FL, USA) at an infusion  
5 rate of 150 nL/min. After infusion, the needle was left in place for ten min to allow for diffusion  
6 of the virus away from the needle tip before its slow withdrawal. Following injections, the scalp  
7 was sutured and the rats were allowed to regain consciousness. Carprofen (5 mg/kg) was  
8 administered subcutaneously as an analgesic before surgery and at 24 and 48 h after surgery.  
9 Following surgery, rats were single-housed for one week, and their weight, fur, eyes and overall  
10 movement were checked daily for signs of distress following the scheme of Roughan and Flecknell  
11 [18]. Animals were then returned to group housing for two weeks prior to further experiments.

## 12 *Immunohistochemistry*

13 At the end of the experiments, rats were euthanized with an overdose of pentobarbital and  
14 immediately perfused transcardially with 150-200 ml of ice-cold phosphate-buffered saline (PBS,  
15 pH 7.4) followed by 100-150 ml of ice-cold 4% paraformaldehyde in PBS. Brains were removed  
16 and stored in 4% paraformaldehyde for 24 h at 4 °C, rinsed twice with PBS, and then cryoprotected  
17 in 30% sucrose/PBS. Brain sections 40  $\mu$ m-thick obtained on a microtome were stored in  
18 cryoprotectant solution at -20 °C. Free-floating sections were immunostained for mCherry (Cat.  
19 #632543, TaKaRa Bio Europe) using the Avidin-Biotin Complex Peroxidase (ABC-P) method  
20 and for TH (Cat. #P21962, Invitrogen) using fluorescent antibodies as described in detail in the  
21 supplementary material.

## 22 *Locomotor activity and prepulse inhibition of the startle response*

23 First, we assessed the individual startle responses of the rats as described in detail in the  
24 supplementary material. On the experimental day, locomotor activity and prepulse inhibition of  
25 the startle response were recorded from 43 animals in cohort 1 at baseline and again after CNO  
26 treatment (14 WT (7M / 7F), 15 mDS-DREADD (8M / 7F) and 14 mDS-mCherry rats (7M / 7F)).  
27 Locomotor activity was assessed in a custom-made open field maze consisting of an 80 x 80 cm  
28 arena enclosed by 65 cm opaque walls, with indirect, dim illumination (~10 Lux). On the test day,  
29 rats received an i.p. injection of CNO (0.5 mg/kg in 5% DMSO/Saline), and 20 min later were  
30 placed at the center of the open field and allowed to explore for 40 minutes. Behavior was recorded  
31 with a Basler ace2 Pro video camera with a 4.5-12.5 mm F1.2 lens positioned directly above the  
32 arena and analyzed using Ethovision software, with scoring of distance, velocity, center of field  
33 entries, rearing and grooming. The arena was cleaned with soap and water and then dried between  
34 each session. Immediately after the locomotion recordings, the rats were transferred to the startle  
35 chamber for sensorimotor gating assessment, details of which are described in the supplementary  
36 material.

## 1 *[<sup>18</sup>F]FDG PET scanning*

2 The rats (n=14, (7 mDS-DREADD, 4F/3M), (7 mDS-mCherry, 4F/3M)) were fasted overnight  
3 before the PET scan. At the day of the experiment, they received an s.c. injection of 0.5 mg/kg  
4 CNO (0.5 mg/kg in 5% DMSO/Saline) or saline followed 20 min later by an i.p. injection of 14.1  
5  $\pm$  1.6 MBq FDG (from the clinical in-house production). The rats remained in their home cage for  
6 45 minutes following the [<sup>18</sup>F]FDG injection. Following this uptake period, the rats were sedated  
7 with isoflurane (2–2.5% in oxygen) and placed in a homemade four rat insert in a Siemens HRRT  
8 (High Resolution Research Tomograph) scanner [19] for a 45-min list-mode emission scan. The  
9 rats were kept warm using an infrared lamp and monitored for respiration throughout the scan.  
10 PET images were cropped to brain-only images for each rat and manually co-registration to an  
11 FDG-specific rat brain template. Individual scans were converted to SUV units and normalized to  
12 whole-brain uptake as described in detail in the supplementary material. The images were averaged  
13 per group/condition and the voxelwise difference was calculated between conditions. We  
14 undertook a regional analysis for each animal in Nucleus Acumbens (NAc), mDS, lateral Dorsal  
15 Striatum (IDS), Anterior Cingulate Cortex (ACC), mPFC, OFC, Thalamus (Thal), the midbrain  
16 including ventral tegmental area and substantia nigra (MB), Hypothalamus (Hyp) and Cerebellum  
17 (Cer), as described in detail in the supplementary material.

## 18 *Magnetic resonance spectroscopy*

19 All MR scans were performed on a Bruker BioSpec 94/30 USR MRI system (9.4T, 30 cm bore,  
20 Bruker, Ettlingen, Germany) as previously described (29). In short, rats were anaesthetized with  
21 2% isoflurane in oxygen, MRS was done sequentially in a 3 x 3 x 3 mm region in the right  
22 hemispheric mDS and then in a 3 x 2 x 3 mm region in mPFC. The spectra were acquired using a  
23 STEAM sequence with TE = 4 ms, TR = 4000 ms, 400 averages, eight dummy scans and 4096  
24 points. VAPOR was used for water suppression. Metabolite concentration calculation was  
25 performed by LCModel using water unsuppressed signal as an internal reference.

26

## 27 **Results**

### 28 *Selective chemogenetic targeting of nigro-striatal dopaminergic projections*

29 We first confirmed the retrograde transduction of nigrostriatal dopamine neurons. Injection of Cre-  
30 dependent serotype 6 adeno associated viruses in the mDS of TH:Cre rats led to selective  
31 retrograde expression of the mCherry reporter gene in dopamine projection neurons arising from  
32 the mSNpc (Fig 1, A and B). Immunohistochemical identification of the mCherry reporter gene  
33 showed excellent selectivity towards the target neurons. Two different viral vectors were injected  
34 into the mDS, one carrying a Gq-coupled DREADD together with mCherry and the other only  
35 mCherry (Figure 1D). The staining intensity and spread from the injection site confirmed a highly  
36 reproducible target transduction in the mDS (Fig. S2A). There was no evident transduction of cell  
37 bodies resident in the mDS, nor of non-TH:Cre positive cells in the mSNpc (Fig. 1, E-J). Notably,  
38 the ventral tegmental area was devoid of mCherry-expressing somata (Fig. 1, E and I).

1 *Nigro-striatal dopaminergic stimulation increases exploratory behaviors and lowers self-*  
2 *grooming*

3 We then tested the efficacy of our transduction by locomotor activity. CNO significantly increased  
4 velocity in mDS-DREADD animals, with a maximal 90% increase occurring after 20 minutes of  
5 exploration, as compared with wildtype (WT) and mDS-mCherry animals (Fig. 2, A and B). The  
6 mDS-DREADD rats showed an increase in total distance travelled and total time spent in  
7 locomotion. WT rats had a 14% decrease in locomotion time following CNO treatment, which we  
8 attribute to a general habituation to the open field during the second exposure (Fig. 2E). Yet, the  
9 number of movement initiations (frequency) was similar in all groups (Fig. 2I). There was  
10 increased number of entries (+125%) and time spent (+119%) in the center of the open field for  
11 mDS-DREADD rats ( $P < 0.0001$ ,  $n = 12$ ) following CNO treatment (Fig. 2, F and J). Time spent  
12 rearing and number of rearing events were similarly increased by 66 and 99%, respectively  
13 ( $P < 0.001$ ,  $n = 12$ ) following CNO treatment in mDS-DREADD rats (Fig. 2, G and K). Self  
14 grooming time and bouts were likewise affected, but in the opposite direction, with significant  
15 reductions of -59% and -38%, respectively ( $P < 0.001$ ,  $n = 12$ ) following CNO treatment (Fig. 2, H  
16 and L). Similarly, for the second batch of animals used for the imaging experiments, there was a  
17 similar increase in total movement ( $P = 0.003$ ,  $n = 9$ ), center entries ( $P = 0.005$ ,  $n = 9$ ) and rearing  
18 ( $P = 0.002$ ,  $n = 9$ ) in mDS-DREADD animals following CNO treatment (Fig. S4, A-C). There were  
19 no main effects of transduction or sex on either behavior. Taken together, mDS-DREADD rats  
20 moved and explored more following CNO treatment compared to WT and mDS-mCherry rats,  
21 while spending less time self-grooming.

22 *Nigro-striatal dopaminergic stimulation affects prepulse inhibition of the acoustic startle response*  
23 *differently in males and females*

24 Prepulse inhibition (PPI) of the acoustic startle response is modulated by CSTC circuit function  
25 and impaired in related neuropsychiatric disorders like OCD [20–22]. To assess PPI, we first tested  
26 basal acoustic startle response (ASR) to different intensity sound pulses. The ASR was clearly  
27 measurable after exceeding 100 dB amplitude and plateaued at 110 dB both in males and females,  
28 with a maximal ASR (as measured at 120 dB) of  $59.1 \pm 8.1\%$  in males ( $n = 21$ ) and  $49.6 \pm 9.1\%$  in  
29 females ( $n = 27$ ) (Fig. 3A). We chose 110 dB as the pulse intensity for subsequent testing of pre-  
30 pulse inhibition (PPI). There was a sex difference in the ASR to various volumes of sound pulses  
31 ( $P < 0.001$ ,  $F(1,46) = 25.2$ ), but no effect of transductions.

32  
33 We then tested startle response (SR) to a 110 dB sound pulse with or without different intensity  
34 prepulses (all pulses are shown in Fig. S5A and D) and short-term habituation (STH) (Fig. S5B  
35 and E). There was no effect of transductions or treatment with CNO on the SR (Fig. 3, D and E),  
36 but there was an overall effect of sex. SR was greater in males ( $58.1 \pm 3.8\%$ ,  $n = 21$ ) than in females  
37 ( $48.6 \pm 4.3\%$ ,  $n = 27$ ) ( $P < 0.001$ ,  $F(1,84) = 30.64$ ), as expected from the initial ASR test (Fig. 3A).  
38 There were no differences in mean STH between WT and transduction groups or between baseline

1 and CNO treatment. However, the mean STH was significant in all female groups combined ( $19.7$   
2  $\pm 6.2\%$ ;  $n=27$ ) (Fig. S5B and E) ( $P=0.008$ ,  $F(1,86)=7.3$ ).

3  
4 In general, SRs decreased in proportion to the amplitude of the prepulse, as expected (Fig. S5A  
5 and D). There were no general effects of transduction or CNO treatment on SR in either sex. Yet,  
6 a reduced SR following CNO treatment in mDS-DREADD females was just shy of statistical  
7 significance (Ave. Diff. =  $3.3 \pm 1.5\%$ ,  $p=0.0501$  ( $F(1,9)=5.11$ )). We next assessed the latency  
8 from startle pulse to startle onset and maximum peak of startle from the SR data above (Fig. S5C  
9 and F). There were no differences in latency with prepulse only and no stimuli (Fig. S5H). Baseline  
10 PPI following the 69 dB prepulse was higher in female than male rats (Fig. S5G) ( $P=0.006$ ,  
11  $F(1,84)=7.86$ ). Transduction did not affect baseline PPI (Fig. 3F and G, and Fig. S5G). There was  
12 a general 24% increase in mDS-DREADD female rats for all pre-pulses amplitudes ( $P=0.022$ ,  
13  $F(1,9)=7.6$ ), and a 58% increase in female mDS-DREADD rats at the 69 dB prepulse condition  
14 upon CNO treatment (Fig. 3G and I) ( $P=0.018$ ,  $n=10$ ).

15 *Nigro-striatal dopaminergic stimulation affects metabolic activity the medial prefrontal cortex and*  
16 *orbitofrontal cortex.*

17 Next, we wanted to know how dorsal striatal dopamine effected clinical neuroimaging  
18 measurements often used to study neuropsychiatric disorders. We used a whole-brain [ $^{18}\text{F}$ ]FDG  
19 PET approach to assess the glucose metabolism in the whole CSTC circuit at once. An image  
20 analysis of voxel intensity showed a relative lower uptake of [ $^{18}\text{F}$ ]FDG in cortical regions and  
21 higher uptake in cerebellar regions in mDS-DREADD rats after CNO treatment (Figure 4A). On  
22 a CSTC regional level, there were significant reductions in [ $^{18}\text{F}$ ]FDG uptake in the mPFC (-9%,  
23  $P = 0.002$ ,  $t = 4.06$ ,  $DF = 60$ ,  $N = 7$ ) and OFC (-8%,  $P = 0.004$ ,  $t = 3.73$ ,  $DF = 49$ ,  $N = 8$ ) following  
24 CNO treatment in mDS-DREADD rats. There were no effects on [ $^{18}\text{F}$ ]FDG uptake in other CSTC  
25 regions of mDS-DREADD, nor in mDS-mCherry rats (Fig. 4B), and no effects of sex or  
26 transduction.

27  
28 *Nigro-striatal dopaminergic stimulation increase glutamate and N-acetylaspartylglutamic acid*  
29 *in medial prefrontal cortex and glutamate levels in dorsal striatum.*

30 Based on the [ $^{18}\text{F}$ ]FDG PET findings (Fig. 4B), we chose two regions (mPFC and DS) for MR  
31 spectroscopy (MRS) measurements of glutamate, glutamine, N-aspartate (NAA) and N-  
32 acetylaspartylglutamic acid (NAAG) *in vivo*. There were significant increases in glutamate ( $P <$   
33  $0.0001$ ,  $t = 5.73$ ,  $DF = 70$ ), total NAA+NAAG ( $P = 0.006$ ,  $t = 3.43$ ,  $DF = 70$ ) and total glutamate  
34 + glutamine ( $P = 0.001$ ,  $t = 3.95$ ,  $DF = 70$ ) levels in the mPFC following CNO treatment in mDS-  
35 DREADD rats (Fig. 5, D and E). Furthermore, significant increases in glutamate ( $P < 0.0001$ ,  $t =$   
36  $5.67$ ,  $DF = 70$ ) and total glutamate + glutamine ( $P < 0.0001$ ,  $t = 5.54$ ,  $DF = 70$ ) levels were found  
37 in the mDS. We found no effect of sex in any group, nor for viral transductions in baseline  
38 conditions. Contrary to our previous findings [23], CNO treatment in mDS-mCherry animals did



1 provoke significant reductions in glutamate ( $P = 0.0002$ ,  $t = 4.69$ ,  $DF = 70$ ) and total glutamate +  
2 glutamine ( $P < 0.0001$ ,  $t = 6.01$ ,  $DF = 70$ ) levels (Fig. 6, F and G) in the mDS.

3

#### 4 **Discussion**

5

6 We present a novel chemogenetic procedure for selective bilateral activation of nigro-striatal  
7 dopamine projections innervating the rat mDS, which enabled us to test effects of dopaminergic  
8 modulation of the CSTC circuit. In this animal model, we tested the specific hypothesis that  
9 selective dopamine activation in the rat mDS would lower compulsive-related behaviors and  
10 reduce cerebral metabolism in the frontal cortex. The least invasive, yet regional selective,  
11 procedure for rodent studies may be chemogenetics, in which transduction of Designer Receptors  
12 Exclusively Activated by Designer Drugs (DREADD) renders target neurons sensitive to G-  
13 protein coupled activation/inactivation following injection of an exogenous ligand, such as  
14 clozapine N-oxide (CNO) [24]. By enabling highly selective and reversible activation of specific  
15 neuronal subtypes and pathways, chemogenetics presents a powerful approach for establishing  
16 causal relationships.

17 *Nigro-striatal dopaminergic stimulation increases exploratory behaviors and lowers self-*  
18 *grooming*

19 We targeted subdivisions of striatal dopaminergic innervations by using TH:Cre rats [25] treated  
20 with retrograde neuronal transduction by the AAV6 serotype, as previously established in rats [26],  
21 mice [27], and non-human primates [28]. We found that CNO increased locomotor activity in all  
22 mDS-DREADD rats. *In vivo* stimulation of hM3Dq DREADDs are well known to induce  
23 phosphatidylinositol hydrolysis [24], c-fos activation [29–31], dopamine release [32], increased  
24 dopamine neuron excitability with a burst firing pattern [30,31,33,34] and ultimately increased  
25 locomotion as a behavioral read-out [30,35–39], which support our findings. We also observed an  
26 increase in exploratory behaviors, entries into center field, and rearing in all mDS-DREADD rats  
27 during chemogenetic activation. Such exploratory behaviors typically increase following treatment  
28 with anxiolytic drugs [40,41], and decrease following stress [41,42], often in a manner independent  
29 of hyperlocomotion, thus suggesting anxiolytic effects of the present perturbation of the CSTC  
30 circuit.

31

32 Self-grooming is an innate rodent behaviour characterized by a sequential pattern of movements  
33 [43], which serves as a useful proxy for compulsive behaviour [22,44,45]. Grooming time and  
34 frequency are under control by the efferent activity of striatal SPNs. Whereas activation of D<sub>1</sub>  
35 receptors on SPNs of the direct (“go”) pathway increase grooming, activation of D<sub>2</sub> receptors on  
36 the indirect (“no-go”) SPNs decrease grooming [43]. Our mDS-DREADD rats showed a  
37 significant decrease of grooming frequency and duration during chemogenetic activation. This  
38 may reflect preferential activation of the (D<sub>2</sub>-expressing) indirect pathway SPNs, although we  
39 cannot rule out the possibility of secondary effect due to hyperlocomotion and increased

1 exploration. The preferential activation of the indirect pathway in our mDS-DREADD rats is  
2 supported by a recent report that the dopamine fibres, which was mapped by retrograde tracing,  
3 innervating the mDS predominantly target the “indirect” D<sub>2</sub>-positive SPNs [46]. Furthermore, a  
4 study by Ahmari et al, showed that hyperactivation of the OFC to DS pathway, increased self-  
5 grooming in rats, which support our findings where lower OFC activity lead to lower self-  
6 grooming [45].

7 *Nigro-striatal dopaminergic stimulation affects prepulse inhibition of the acoustic startle response*  
8 *differently in males and females*

9 PPI is an autonomous behavioral response, which is highly modulated by components of the CSTC  
10 circuit, in particular the PFC [47–50], striatum [51], and the SN [52]. Disruption of normal PPI is  
11 evident in people with OCD [21,53]. Highly conserved across species, the PPI response serves as  
12 a useful translational construct in brain research. While some dopamine agonists disrupt PPI when  
13 given systemically, the relative contributions of D<sub>1</sub>-and D<sub>2/3</sub> receptor pathways in this effect are  
14 debated [54–57]. Thus, converging lines of clinical and preclinical evidence link the CSTC circuit,  
15 dopamine, and PPI. The expression of PPI differs between rodent strains [58,59] and sex [60–62].  
16 Indeed, we found that mDS-DREADD female rats had increased PPI at low prepulse amplitude  
17 during chemogenetic activation, but males showed no such effect. Previous work showed that male  
18 rats with SN lesions [52] as well as male mice with striatal lesions [63] displayed disruption of  
19 PPI, but there was no corresponding investigation of female rats in those studies. In another  
20 investigation, deep brain stimulation (DBS) of the NAc disrupted PPI in male WT rats, whereas  
21 the same DBS rescued disrupted PPI in a male rat model of schizophrenia [49], which implies  
22 context-dependence of the behavior consequences of stimulated dopamine release.

23  
24 A limitation to this study lies in our use of CNO to activate DREADDs. CNO metabolizes *in vivo*  
25 to clozapine, which is presumably the main agonist on DREADDs [23,64–66]. While clozapine is  
26 an antagonist at endogenous dopamine D<sub>2/3</sub> and serotonin 5-HT<sub>2A</sub> receptors, it has selectivity for  
27 DREADDs when administered at the present low dose. Indeed, we did not observe any behavioural  
28 effects of CNO/clozapine in control rats in this study, nor had we seen any occupancy at D<sub>2/3</sub> or 5-  
29 HT<sub>2A</sub> receptors in an earlier *in vivo* binding experiment [23]. Furthermore, clozapine treatment can  
30 restore disrupted PPI [56,59,67], but neither we nor others [65] have measured any intrinsic effects  
31 of CNO on PPI in WT or control animals at the dose used, which also argues for selective  
32 activation of DREADDs.

33 *Nigro-striatal dopaminergic stimulation affects metabolic activity the medial prefrontal cortex and*  
34 *orbitofrontal cortex.*

35 Metabolic mapping of [<sup>18</sup>F]FDG uptake by PET can identify perturbation of neuronal circuits  
36 related to behavior, chemical stimulation, or chemogenetic-induced circuit modulation [49,50,68–  
37 71]. We found that chemogenetic activation in mDS-DREADD rats elicited hypometabolism in

1 fronto-cortical areas (Fig 4A and B). This confirms the behavioral findings described above  
2 suggesting that mDS dopamine activation controls fronto-cortical neuronal activity through the  
3 CSTC circuit. Serves et al. showed that acute treatment of rats with the dopamine D<sub>2/3</sub> receptor  
4 agonist quinpirole provoked a global increase in [<sup>18</sup>F]FDG whole-brain uptake, yet a relatively  
5 lesser increase in NAc, mDS, and the fronto-cortical regions, i.e. mPFC, ACC and OFC [71],  
6 suggesting a common mechanism to the present DREADD study. Globally increased [<sup>18</sup>F]FDG  
7 uptake might hide regional differences in metabolism, emphasizing the importance of whole-brain  
8 normalization between baseline and test conditions [72]. Our use of the human HRRT PET  
9 scanner, which has lesser spatial resolution (2 mm) compared with contemporary dedicated small  
10 animal scanners (1 mm), limits our ability to detect small focal changes in metabolism. We  
11 accommodate the resolution issue by using relatively large bilateral VOIs.

12

13 *Nigro-striatal dopaminergic stimulation increase glutamate and N-acetylaspartylglutamic acid*  
14 *in medial prefrontal cortex and glutamate levels in dorsal striatum.*

15 Our MR spectroscopy results showed increases in glutamate and NAAG in the mPFC, and  
16 increased glutamate in the mDS during chemogenetic activation, which may seem at odds with the  
17 PET finding of lower [<sup>18</sup>F]FDG uptake in frontal cortex. While the exact relationship between  
18 [<sup>18</sup>F]FDG uptake and total glutamate levels is unknown, we suppose that glutamate is stored in the  
19 terminals of glutamatergic afferents in the mPFC, which are presumably thalamic or cortical inputs  
20 through the CSTC circuit, while NAAG is mainly located in interneurons [73]. Once released into  
21 the synapse, glutamate is taken up by astroglial cells and converted into glutamine, whereas NAAG  
22 is metabolized to NAA and glutamate [74,75]. In this scenario, the increased glutamate and NAAG  
23 levels measured by MR spectroscopy during chemogenetic activation may thus reflect elevated  
24 vesicular concentrations in thalamic or cortical afferent terminals, due to indirect inhibition via  
25 mDS dopaminergic activation of the indirect (no-go) pathway. NAAG signaling is not completely  
26 understood, but some evidence points towards it having an inhibitory effect on GABA release,  
27 such that lower NAAG release might result in net inhibition of cortico-striatal projections [76].  
28 Such an inhibition could account for the lower cortical [<sup>18</sup>F]FDG uptake and consequently lower  
29 glutamatergic activity in the DS, resulting in increased vesicular glutamate content in DS.  
30 Furthermore, we suppose that mDS-DREADD stimulation also stimulates dopamine neurons that  
31 co-release glutamate [77,78], which in turn might favor the local astroglial conversion of glutamine  
32 to glutamate [74,75].

33

34 As noted above, there is no general model to connect glutamate levels measured with MRS to  
35 [<sup>18</sup>F]FDG uptake. One study reported no correlation between these two markers in WT mice,  
36 although there was a clear inverse relationship in mGluR5 KO mice [79]. That finding resembles  
37 present observations in the mDS-DREADD group, suggesting a similar perturbation of the  
38 coupling between glutamate levels and energy metabolism. We did observe a change in DS  
39 glutamate levels in the mCherry animals, as in our previous study, albeit at higher doses of CNO  
40 [23]. Thus, it remains possible that CNO metabolism to clozapine may indeed contribute to the

1 cerebrometabolic changes reported in this study, albeit in the opposite direction; our results may  
2 therefore underestimate the effect of mDS dopamine activity on local glutamate levels

### 3 *Translational relevance*

4 Changes in striatal dopamine and prefrontal cortical glutamate levels are held to be central  
5 etiological factors for neuropsychiatric disorders that involve the CSTC circuit, such as OCD [13]  
6 and Tourette's Syndrome [80]. In a recent PET study with DBS of the ventral striatum in people  
7 with treatment-resistant OCD, increased dopamine release correlated with a decline in OCD  
8 related symptoms [81]. Furthermore Nordstrom et al. found that systemic administration of the  
9 D<sub>2/3</sub> receptor agonist bromocriptine suppressed "Tics" in a transgenic mouse model of Tourette's  
10 Syndrome [82], supporting an earlier clinical report that bromocriptine may be helpful in some  
11 OCD patients [83]. Our results are a step towards disentangling the functional and metabolic  
12 effects of specific elements in the CSTC circuit and support the proposition that mDS might be a  
13 relevant DBS target in neuropsychiatric diseases involving compulsive or impulsive behaviors.

### 14 *Conclusion*

15 We found that chemogenetic activation of dopamine neurons projecting to mDS potentiated rat  
16 exploratory behavior, lowered self-grooming, and enhanced prepulse inhibition of the startle  
17 response. These behavioral changes occurred in association with reduced metabolic activity in  
18 frontal cortex as measured by [<sup>18</sup>F]FDG PET and increased glutamate and NAAG levels in the  
19 mPFC as measured by MRS. Our study thus revealed that dopamine signaling in mDS exerted  
20 modulatory control of fronto-cortical metabolic activity and the orchestration of behavior related  
21 to CSTC circuit function. These results support our hypothesis that dopamine release in the mDS  
22 can be a driver for reduced cortical metabolism in distal parts of the CSTC circuit and suggest that  
23 dopamine activation in the mDS reduce anxiety and compulsive behaviors.

24

1    **Acknowledgments**

2    Structural reference MR image is generously provided by Kristian Nygaard Mortensen, Center for  
3    Translational Neuromedicine, University of Copenhagen. Technical expertise regarding acoustic  
4    startle response and prepulse inhibition was generously provided by Kim Fejgin at H. Lundbeck.  
5    Radiochemical support was generously provided by Matthias M. Herth and Vladimir Shalgunov,  
6    Department of Drug Design and Pharmacology, University of Copenhagen. Statistical discussions  
7    with Professor Todd Ogden, Department of Biostatistics, Columbia University, NY. Professor,  
8    DM Gitte M. Knudsen, head of the Neurobiology Research Unit, Copenhagen University Hospital,  
9    offered her support and guidance for students and researchers throughout the project. Funding for  
10   this project was provided to Mikael Palner by the Lundbeck Foundation (R192-2015-1591 and  
11   R194-2015-1589), Augustinus Foundation (18-3746 and 17-1982, Independent Research Fund  
12   Denmark (5053-00036B), Savværksejer Jeppe Juhls og Hustrus Ovita Juhls Mindelegat and  
13   Købmand i Odense Johann og Hanne Weimann født Seedorffs Legat.

14

15    **Disclosures**

16    Mikael Palner is collaborating with the pharmaceutical company Compass Pathways Plc (London,  
17    UK). All other authors declare no financial interests or potential conflicts of interest.

18

19

20

## 1   **References**

- 2   1.   Peters SK, Dunlop K, Downar J. Cortico-striatal-thalamic loop circuits of the salience  
3       network: A central pathway in psychiatric disease and treatment. *Front Syst Neurosci.*  
4       2016;10:1–23.
- 5   2.   Ahmari SE, Dougherty DD. DISSECTING OCD CIRCUITS: FROM ANIMAL MODELS  
6       TO TARGETED TREATMENTS. *Depress Anxiety.* 2015;32:550–562.
- 7   3.   Simpson EH, Kellendonk C. Insights About Striatal Circuit Function and Schizophrenia  
8       From a Mouse Model of Dopamine D2 Receptor Upregulation. *Biol Psychiatry.*  
9       2017;81:21–30.
- 10  4.   Howes OD, Kapur S. The Dopamine Hypothesis of Schizophrenia: Version III--The Final  
11       Common Pathway. *Schizophr Bull.* 2009;35:549–562.
- 12  5.   Denys D, de Vries F, Cath D, Figeet M, Vulink N, Veltman DJ, et al. Dopaminergic activity  
13       in Tourette syndrome and obsessive-compulsive disorder. *Eur Neuropsychopharmacol.*  
14       2013;23:1423–1431.
- 15  6.   Graybiel AM. Chapter 10 - The Basal Ganglia. *Conn's Transl Neurosci.* 2017:219–225.
- 16  7.   Zuo C, Ma Y, Sun B, Peng S, Zhang H, Eidelberg D, et al. Metabolic imaging of bilateral  
17       anterior capsulotomy in refractory obsessive compulsive disorder: an FDG PET study. *J*  
18       *Cereb Blood Flow Metab.* 2013;33:880–887.
- 19  8.   Horwitz B, Swedo SE, Grady CL, Pietrini P, Schapiro MB, Rapoport JL, et al. Cerebral  
20       metabolic pattern in obsessive-compulsive disorder: Altered intercorrelations between  
21       regional rates of glucose utilization. *Psychiatry Res Neuroimaging.* 1991;40:221–237.
- 22  9.   Menzies L, Chamberlain SR, Laird AR, Thelen SM, Sahakian BJ, Bullmore ET. Integrating  
23       evidence from neuroimaging and neuropsychological studies of obsessive-compulsive  
24       disorder: the orbitofronto-striatal model revisited. *Neurosci Biobehav Rev.* 2008;32:525–  
25       549.
- 26  10.  Whiteside SP, Port JD, Abramowitz JS. A meta-analysis of functional neuroimaging in  
27       obsessive-compulsive disorder. *Psychiatry Res Neuroimaging.* 2004;132:69–79.
- 28  11.  Haber SN. Corticostriatal circuitry. *Dialogues Clin Neurosci.* 2016;18:7–21.
- 29  12.  Aoki Y, Aoki A, Suwa H. Reduction of N-acetylaspartate in the medial prefrontal cortex  
30       correlated with symptom severity in obsessive-compulsive disorder: Meta-analyses of 1 H-  
31       MRS studies. *Transl Psychiatry.* 2012;2:e153-10.
- 32  13.  Rosenberg DR, Macmaster FP, Keshavan MS, Fitzgerald KD, Stewart CM, Moore GJ.  
33       Decrease in caudate glutamatergic concentrations in pediatric obsessive-compulsive  
34       disorder patients taking paroxetine. *J Am Acad Child Adolesc Psychiatry.* 2000;39:1096–  
35       1103.
- 36  14.  Rosenberg DR, Mirza Y, Russell A, Tang J, Smith JM, Banerjee SP, et al. Reduced anterior  
37       cingulate glutamatergic concentrations in childhood OCD and major depression versus  
38       healthy controls. *J Am Acad Child Adolesc Psychiatry.* 2004;43:1146–1153.
- 39  15.  Palner M, Kjaerby C, Knudsen GM, Cumming P. Effects of unilateral 6-OHDA lesions on  
40       [ 3H]-N- propylnorapomorphine binding in striatum ex vivo and vulnerability to  
41       amphetamine-evoked dopamine release in rat. *Neurochem Int.* 2011;58:243–247.
- 42  16.  Casteels C, Lauwers E, Bormans G, Baekelandt V, Van Laere K. Metabolic-dopaminergic  
43       mapping of the 6-hydroxydopamine rat model for Parkinson's disease. *Eur J Nucl Med Mol*  
44       *Imaging.* 2008;35:124–134.
- 45  17.  Sala-Bayo J, Fiddian L, Nilsson SRO, Hervig ME, McKenzie C, Mareschi A, et al. Dorsal  
46       and ventral striatal dopamine D1 and D2 receptors differentially modulate distinct phases

- 1 of serial visual reversal learning. *Neuropsychopharmacology*. 2020;45:736–744.
- 2 18. Roughan J V., Flecknell PA. Behavioural effects of laparotomy and analgesic effects of  
3 ketoprofen and carprofen in rats. *Pain*. 2001;90:65–74.
- 4 19. Keller SH, L'Estrade EN, Dall B, Palner M, Herth M. Quantification accuracy of a new  
5 HRRT high throughput rat hotel using transmission-based attenuation correction: A  
6 phantom study. 2016 IEEE Nucl. Sci. Symp. Med. Imaging Conf. Room-Temperature  
7 Semicond. Detect. Work., IEEE; 2016. p. 1–3.
- 8 20. Hoenig K, Hochrein A, Quednow BB, Maier W, Wagner M. Impaired prepulse inhibition  
9 of acoustic startle in obsessive-compulsive disorder. *Biol Psychiatry*. 2005;57:1153–1158.
- 10 21. Ahmari SE, Risbrough VB, Geyer MA, Simpson HB. Impaired sensorimotor gating in  
11 unmedicated adults with obsessive-compulsive disorder. *Neuropsychopharmacology*.  
12 2012;37:1216–1223.
- 13 22. Manning EE, Wang AY, Saikali LM, Winner AS, Ahmari SE. Disruption of prepulse  
14 inhibition is associated with compulsive behavior severity and nucleus accumbens  
15 dopamine receptor changes in Sapap3 knockout mice. *Sci Rep*. 2021;11:9442.
- 16 23. Baerentzen S, Casado-Sainz A, Lange D, Shalgunov V, Tejada IM, Xiong M, et al. The  
17 chemogenetic receptor ligand Clozapine N-oxide induces in vivo neuroreceptor occupancy  
18 and reduces striatal glutamate levels. *Front Neurosci*. 2019;13:187.
- 19 24. Armbruster BN, Li X, Pausch MH, Herlitze S, Roth BL. Evolving the lock to fit the key to  
20 create a family of G protein-coupled receptors potently activated by an inert ligand. *Proc*  
21 *Natl Acad Sci U S A*. 2007;104:5163–5168.
- 22 25. Witten IBB, Steinberg EEE, Lee SYY, Davidson TJJ, Zalocusky KAA, Brodsky M, et al.  
23 Recombinase-Driver Rat Lines: Tools, Techniques, and Optogenetic Application to  
24 Dopamine-Mediated Reinforcement. *Neuron*. 2011;72:721–733.
- 25 26. Salegio EA, Samaranch L, Kells AP, Mittermeyer G, San Sebastian W, Zhou S, et al.  
26 Axonal transport of adeno-associated viral vectors is serotype-dependent. *Gene Ther*.  
27 2013;20:348–352.
- 28 27. Aschauer DF, Kreuz S, Rumpel S. Analysis of Transduction Efficiency, Tropism and  
29 Axonal Transport of AAV Serotypes 1, 2, 5, 6, 8 and 9 in the Mouse Brain. *PLoS One*.  
30 2013;8:e76310.
- 31 28. San Sebastian W, Samaranch L, Heller G, Kells a P, Bringas J, Pivrotto P, et al. Adeno-  
32 associated virus type 6 is retrogradely transported in the non-human primate brain. *Gene*  
33 *Ther*. 2013;20:1178–1183.
- 34 29. Szablowski JO, Lee-gosselin A, Lue B, Malounda D, Shapiro MG. Non-Invasive Control  
35 of Neural Circuits. *Nat Biomed Eng*. 2018;2:1–11.
- 36 30. Mahler S V., Brodник ZD, Cox BM, Buchta WC, Bentzley BS, Cope ZA, et al.  
37 Chemogenetic Manipulations of Ventral Tegmental Area Dopamine Neurons Reveal  
38 Multifaceted Roles in Cocaine Abuse. *BioRxiv*. 2018;39:503–518.
- 39 31. Cho J, Ryu S, Lee S, Kim J, Kim HI. Optimizing clozapine for chemogenetic  
40 neuromodulation of somatosensory cortex. *Sci Rep*. 2020;10:1–11.
- 41 32. Mimura K, Nagai Y, Inoue K, Matsumoto J, Hori Y, Sato C, et al. Chemogenetic activation  
42 of nigrostriatal dopamine neurons in freely moving common marmosets. 2021:1–10.
- 43 33. Sciolino NR, Plummer NW, Chen Y-W, Alexander GM, Robertson SD, Dudek SM, et al.  
44 Recombinase-Dependent Mouse Lines for Chemogenetic Activation of Genetically Defined  
45 Cell Types. *Cell Rep*. 2016;15:2563–2573.
- 46 34. Dell'Anno MT, Caiazzo M, Leo D, Dvoretzskova E, Medrihan L, Colasante G, et al. Remote

- 1 control of induced dopaminergic neurons in parkinsonian rats. *J Clin Invest.*  
2 2014;124:3215–3229.
- 3 35. Bonaventura J, Eldridge MAG, Hu F, Gomez JL, Sanchez-Soto M, Abramyan AM, et al.  
4 High-potency ligands for DREADD imaging and activation in rodents and monkeys. *Nat*  
5 *Commun.* 2019;10:4627.
- 6 36. Runegaard AH, Fitzpatrick CM, Woldbye DPD, Andreasen JT, Sørensen AT, Gether U.  
7 Modulating Dopamine Signaling and Behavior with Chemogenetics: Concepts, Progress,  
8 and Challenges. *Pharmacol Rev.* 2019;71:123–156.
- 9 37. Jackson BP, Dietz SM, Wightman RM. Fast-Scan Cyclic Voltammetry of 5-  
10 Hydroxytryptamine. *Anal Chem.* 1995;67:1115–1120.
- 11 38. Wang S, Tan Y, Zhang JE, Luo M. Pharmacogenetic activation of midbrain dopaminergic  
12 neurons induces hyperactivity. *Neurosci Bull.* 2013;29:517–524.
- 13 39. Boender AJ, de Jong JW, Boekhoudt L, Luijendijk MCM, van der Plasse G, Adan R a H.  
14 Combined use of the canine adenovirus-2 and DREADD-technology to activate specific  
15 neural pathways in vivo. *PLoS One.* 2014;9:e95392.
- 16 40. Prut L, Belzung C. The open field as a paradigm to measure the effects of drugs on anxiety-  
17 like behaviors: A review. *Eur J Pharmacol.* 2003;463:3–33.
- 18 41. Carli M, Prontera C, Samanin R. Effect of 5-HT1A agonists on stress-induced deficit in  
19 open field locomotor activity of rats: Evidence that this model identifies anxiolytic-like  
20 activity. *Neuropharmacology.* 1989;28:471–476.
- 21 42. Sturman O, Germain P, Bohacek J. Exploratory rearing : a context- and stress-sensitive  
22 behavior recorded in the open-field test. *Stress.* 2018;21:443–452.
- 23 43. Berridge KC, Aldridge JW. Super-stereotypy I: Enhancement of a complex movement  
24 sequence by systemic dopamine D1 agonists. *Synapse.* 2000;37:194–204.
- 25 44. Kalueff A V, Stewart AM, Song C, Berridge KC, Graybiel AM, Fentress JC. Neurobiology  
26 of rodent self-grooming and its value for translational neuroscience. *Nat Rev Neurosci.*  
27 2016;17:45–59.
- 28 45. Ahmari SE, Spellman T, Douglass NL, Kheirbek MA, Simpson HB, Deisseroth K, et al.  
29 Repeated cortico-striatal stimulation generates persistent OCD-like behavior. *Science.*  
30 2013;340:1234–1239.
- 31 46. Lu J, Cheng Y, Xie X, Woodson K, Bonifacio J, Disney E, et al. Whole-Brain Mapping of  
32 Direct Inputs to Dopamine D1 and D2 Receptor-Expressing Medium Spiny Neurons in the  
33 Posterior Dorsomedial Striatum. *Eneuro.* 2020:ENEURO.0348-20.2020.
- 34 47. Bubser M, Koch M. Prepulse inhibition of the acoustic startle response of rats is reduced by  
35 6-hydroxydopamine lesions of the medial prefrontal cortex. *Psychopharmacology (Berl).*  
36 1994;113:487–492.
- 37 48. Zavitsanou K. Dopamine Antagonists in the Orbital Prefrontal Cortex Reduce Prepulse  
38 Inhibition of the Acoustic Startle Reflex in the Rat. *Pharmacol Biochem Behav.*  
39 1999;63:55–61.
- 40 49. Bikovsky L, Hadar R, Soto-Montenegro ML, Klein J, Weiner I, Desco M, et al. Deep brain  
41 stimulation improves behavior and modulates neural circuits in a rodent model of  
42 schizophrenia. *Exp Neurol.* 2016;283:142–150.
- 43 50. Rohleder C, Wiedermann D, Neumaier B, Drzezga A, Timmermann L, Graf R, et al. The  
44 Functional Networks of Prepulse Inhibition: Neuronal Connectivity Analysis Based on  
45 FDG-PET in Awake and Unrestrained Rats. *Front Behav Neurosci.* 2016;10:148.
- 46 51. Swerdlow NR, Geyer MA, Braff DL. Neural circuit regulation of prepulse inhibition of



- 1 startle in the rat: Current knowledge and future challenges. *Psychopharmacology (Berl)*.  
2 2001;156:194–215.
- 3 52. Koch M, Fendt M, Kretschmer BD. Role of the substantia nigra pars reticulata in  
4 sensorimotor gating, measured by prepulse inhibition of startle in rats. *Behav Brain Res*.  
5 2000;117:153–162.
- 6 53. Ahmari SE, Risbrough VB, Geyer MA, Simpson HB. Prepulse Inhibition Deficits in  
7 Obsessive-Compulsive Disorder are More Pronounced in Females.  
8 *Neuropsychopharmacology*. 2016;41:2963–2964.
- 9 54. Rodrigues S, Salum C, Ferreira TL. Dorsal striatum D1-expressing neurons are involved  
10 with sensorimotor gating on prepulse inhibition test. *J Psychopharmacol*.  
11 2017:026988111668687.
- 12 55. Bortolato M, Aru GN, Fà M, Frau R, Orrù M, Salis P, et al. Activation of D1, but not D2  
13 receptors potentiates dizocilpine-mediated disruption of prepulse inhibition of the startle.  
14 *Neuropsychopharmacology*. 2005;30:561–574.
- 15 56. Geyer MA, Krebs-Thomson K, Braff DL, Swerdlow NR. Pharmacological studies of  
16 prepulse inhibition models of sensorimotor gating deficits in schizophrenia: A decade in  
17 review. vol. 156. 2001.
- 18 57. Weber M, Chang WL, Breier MR, Yang A, Millan MJ, Swerdlow NR. The effects of the  
19 dopamine D2 agonist sumanirole on prepulse inhibition in rats. *Eur*  
20 *Neuropsychopharmacol*. 2010;20:421–425.
- 21 58. Plappert CF, Pilz PKD, Schnitzler H-U. Factors governing prepulse inhibition and prepulse  
22 facilitation of the acoustic startle response in mice. *Behav Brain Res*. 2004;152:403–412.
- 23 59. Swerdlow, M.D., Ph.D. N. Discrepant Findings of Clozapine Effects on Prepulse Inhibition  
24 of Startle: Is It the Route or the Rat? *Neuropsychopharmacology*. 1998;18:50–56.
- 25 60. Faraday MM. Rat sex and strain differences in responses to stress. *Physiol Behav*.  
26 2002;75:507–522.
- 27 61. Lehmann J, Pryce CR, Feldon J. Sex differences in the acoustic startle response and prepulse  
28 inhibition in Wistar rats. *Behav Brain Res*. 1999;104:113–117.
- 29 62. Tylš F, Páleníček T, Kadeřábek L, Lipski M, Kubešová A, Horáček J. Sex differences and  
30 serotonergic mechanisms in the behavioural effects of psilocin. *Behav Pharmacol*.  
31 2016;27:309–320.
- 32 63. Baldan Ramsey LC, Xu M, Wood N, Pittenger C. Lesions of the dorsomedial striatum  
33 disrupt prepulse inhibition. *Neuroscience*. 2011;180:222–228.
- 34 64. Ilg A-K, Enkel T, Bartsch D, Bähner F. Behavioral Effects of Acute Systemic Low-Dose  
35 Clozapine in Wild-Type Rats: Implications for the Use of DREADDs in Behavioral  
36 Neuroscience. *Front Behav Neurosci*. 2018;12.
- 37 65. MacLaren DAA, Browne RW, Shaw JK, Radhakrishnan SK, Khare P, España RA, et al.  
38 Clozapine N-oxide administration produces behavioral effects in long-evans rats:  
39 Implications for designing DREADD experiments. *ENeuro*. 2016;3.
- 40 66. Gomez JL, Bonaventura J, Lesniak W, Mathews WB, Sysa-shah P, Rodriguez LA, et al.  
41 Chemogenetics Revealed: DREADD Occupancy and Activation Via Converted Clozapine.  
42 *Science (80- )*. 2017;357:503–507.
- 43 67. De Carolis L, Stasi MA, Serlupi-Crescenzi O, Borsini F, Nencini P. The effects of clozapine  
44 on quinpirole-induced non-regulatory drinking and prepulse inhibition disruption in rats.  
45 *Psychopharmacology (Berl)*. 2010;212:105–115.
- 46 68. Apetz N, Kordys E, Simon M, Mang B, Aswendt M, Wiedermann D, et al. Effects of

- 1 subthalamic deep brain stimulation on striatal metabolic connectivity in a rat  
2 hemiparkinsonian model. *DMM Dis Model Mech.* 2019;12.
- 3 69. Urban DJ, Zhu H, Marcinkiewicz CA, Michaelides M, Oshibuchi H, Rhea D, et al.  
4 Elucidation of The Behavioral Program and Neuronal Network Encoded by Dorsal Raphe  
5 Serotonergic Neurons. *Neuropsychopharmacology.* 2015:1–12.
- 6 70. Michaelides M, Anderson SAR, Ananth M, Smirnov D, Thanos PK, Neumaier JF, et al.  
7 Whole-brain circuit dissection in free-moving animals reveals cell-specific  
8 mesocorticolimbic networks. *J Clin Invest.* 2013;123:5342–5350.
- 9 71. Servaes S, Glorie D, Verhaeghe J, Wyffels L, Stroobants S, Staelens S. [18F]-FDG PET  
10 neuroimaging in rats with quinpirole-induced checking behavior as a model for obsessive  
11 compulsive disorder. *Psychiatry Res Neuroimaging.* 2016;257:31–38.
- 12 72. Borghammer P, Cumming P, Aanerud J, Gjedde A. Artefactual subcortical hyperperfusion  
13 in PET studies normalized to global mean: Lessons from Parkinson’s disease. *Neuroimage.*  
14 2009;45:249–257.
- 15 73. Moffett JR, Namboodiri MAA, Neale JH. Enhanced carbodiimide fixation for  
16 immunohistochemistry: Application to the comparative distributions of N-  
17 acetylaspartylglutamate and N- acetylaspartate immunoreactivities in rat brain. *J Histochem*  
18 *Cytochem.* 1993;41:559–570.
- 19 74. Bak LK, Schousboe A, Waagepetersen HS. The glutamate/GABA-glutamine cycle: aspects  
20 of transport, neurotransmitter homeostasis and ammonia transfer. *J Neurochem.*  
21 2006;98:641–653.
- 22 75. Agarwal N, Renshaw PF. Proton MR spectroscopy - Detectable major neurotransmitters of  
23 the brain: Biology and possible clinical applications. *Am J Neuroradiol.* 2012;33:595–602.
- 24 76. Zhao J, Ramadan E, Cappiello M, Wroblewska B, Bzdega T, Neale JH. NAAG inhibits  
25 KCl-induced [3H]-GABA release via mGluR3, cAMP, PKA and L-type calcium  
26 conductance. *Eur J Neurosci.* 2001;13:340–346.
- 27 77. Sulzer D, Joyce MP, Lin L, Geldwert D, Haber SN, Hattori T, et al. Dopamine neurons  
28 make glutamatergic synapses in vitro. *J Neurosci.* 1998;18:4588–4602.
- 29 78. Trudeau LÉ. Glutamate co-transmission as an emerging concept in monoamine neuron  
30 function. *J Psychiatry Neurosci.* 2004;29:296–310.
- 31 79. Joo YH, Kim YK, Choi IG, Kim HJ, Son YD, Kim HK, et al. In vivo glucose metabolism  
32 and glutamate levels in mGluR5 knockout mice: a multimodal neuroimaging study using  
33 [18F]FDG microPET and MRS. *EJNMMI Res.* 2020;10.
- 34 80. Wang Z, Maia T V, Marsh R, Colibazzi T, Gerber A, Peterson BS. The neural circuits that  
35 generate tics in Tourette’s syndrome. *Am J Psychiatry.* 2011;168:1326–1337.
- 36 81. Figeo M, Luigjes J, Smolders R, Valencia-Alfonso CE, Van Wingen G, De Kwaasteniet B,  
37 et al. Deep brain stimulation restores frontostriatal network activity in obsessive-  
38 compulsive disorder. *Nat Neurosci.* 2013;16:386–387.
- 39 82. Nordstrom EJ, Bittner KC, McGrath MJ, Parks CR, Burton FH. Hyperglutamatergic  
40 cortico-striato-thalamo-cortical circuit breaker drugs alleviate tics in a transgenic circuit  
41 model of Tourette’s syndrome. *Brain Res.* 2015;1629:38–53.
- 42 83. Ceccherini-Nelli A, Guazzelli M. Treatment of refractory OCD with the dopamine agonist  
43 bromocriptine. *J Clin Psychiatry.* 1994;55:415–416.

#### 44 **Supplementary Materials**

45 Study Design

- 1 Chemicals
- 2 Viral Vectors
- 3 Software
- 4 Breeding and Phenotypic Assessment in Animals
- 5 Immunohistochemistry details
- 6 Acoustic startle response
- 7 Prepulse inhibition of the acoustic startle response
- 8 [<sup>18</sup>F]FDG PET scanning
- 9
- 10 ***Supplementary Figures***
- 11 Fig. S1. Experimental setup.
- 12 Fig. S2. Quantification of transduction in rats.
- 13 Fig. S3: Second batch of locomotor experiments in animals for imaging experiments.
- 14 Fig. S4: Additional acoustic startle data.
- 15 Fig. S5: A selected [<sup>18</sup>F]FDG-PET rat brain image with all atlas VOIs
- 16

1 **Figures**

2

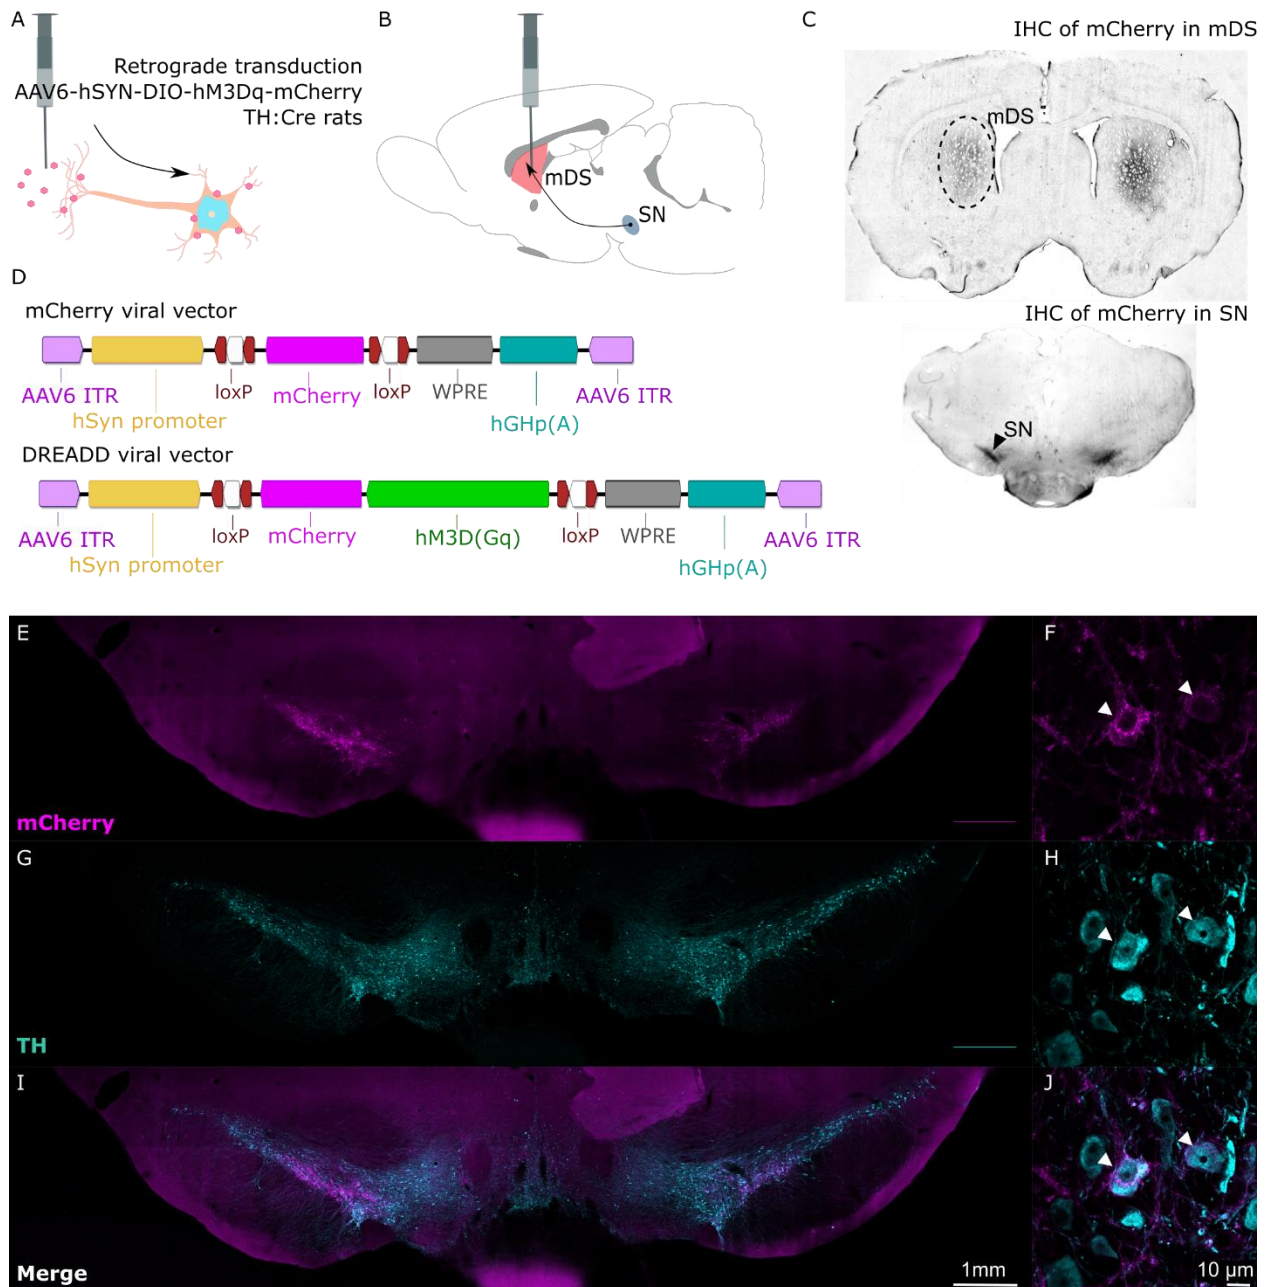

3

4 Figure 1: A,B) Retrograde transduction of Cre-positive tyrosine hydroxylase (TH) expressing neurons in the  
5 dorsomedial striatum. C) Immunohistochemical staining of mCherry in dorsomedial striatum and in substantia nigra.  
6 D) Viral vectors used in the vehicle (mDS-mCherry) and chemogenetic (mDS-DREADD) transduction groups. E,G,I)  
7 Fluorescent microscopy of mCherry (viral transduced) and TH-positive (dopamine) cells in the mesencephalon.  
8 F,H,J) Magnifications of individual transduced cells (two examples labelled with white arrows) in the SN.

9

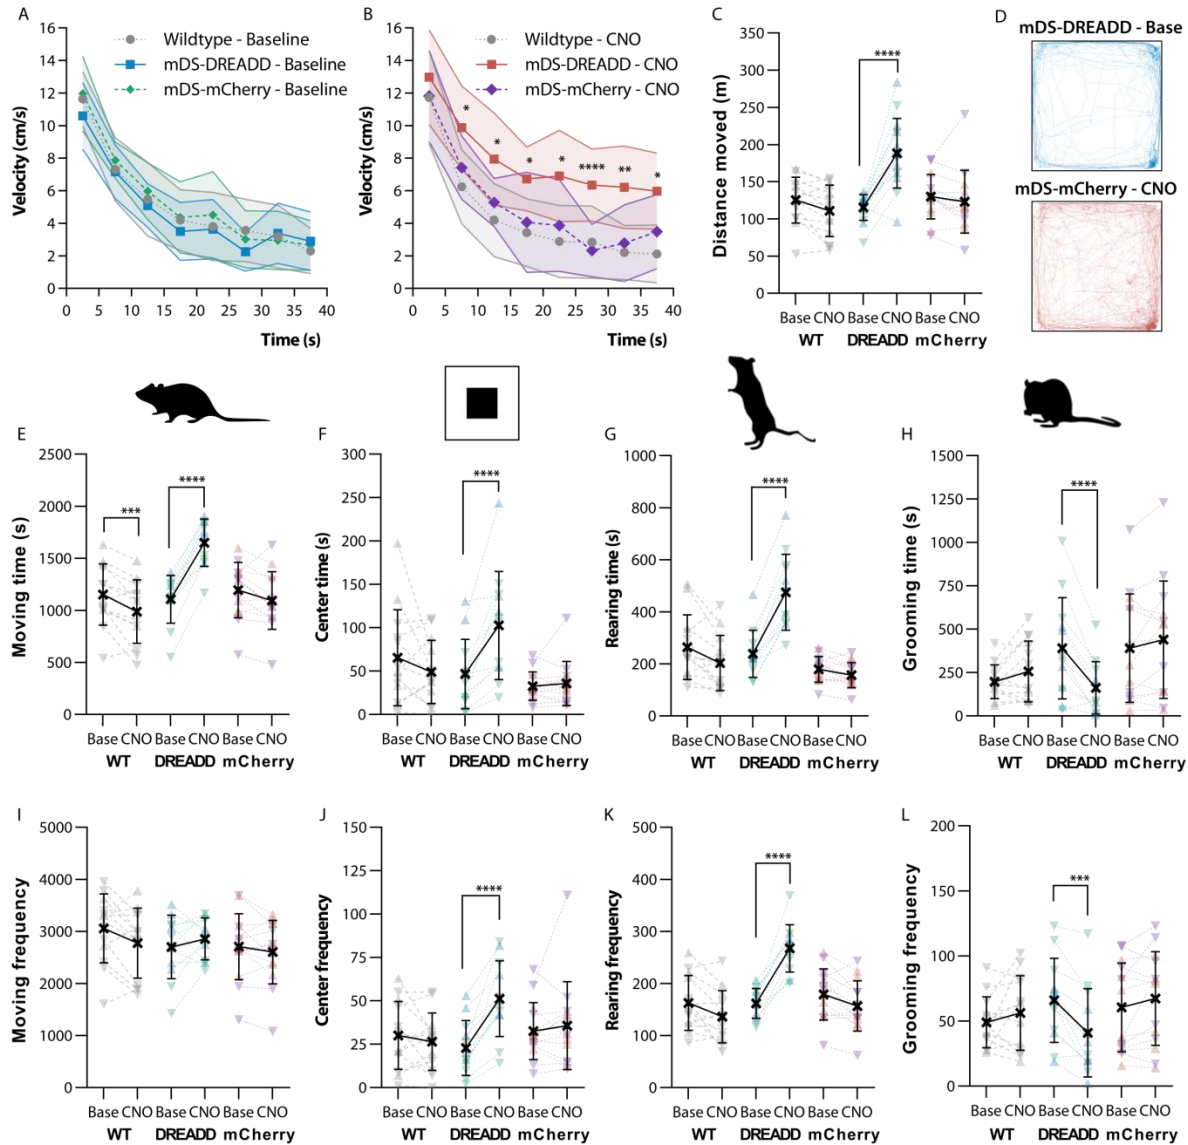

1  
 2 Figure 2: Open field behavior. A, B) Velocity over time in the open field. C) Total distance traveled over the whole-  
 3 time course. D) Tracking of the median mDS-DREADD rat before and after CNO. E, F, G, H) Total time spent  
 4 moving, in the center of the open field, rearing or grooming. I, J, K, L) Frequency of movement initiations, entries  
 5 into the center square, rearings or grooming bouts. (♂ = ▲) (♀ = ▼).

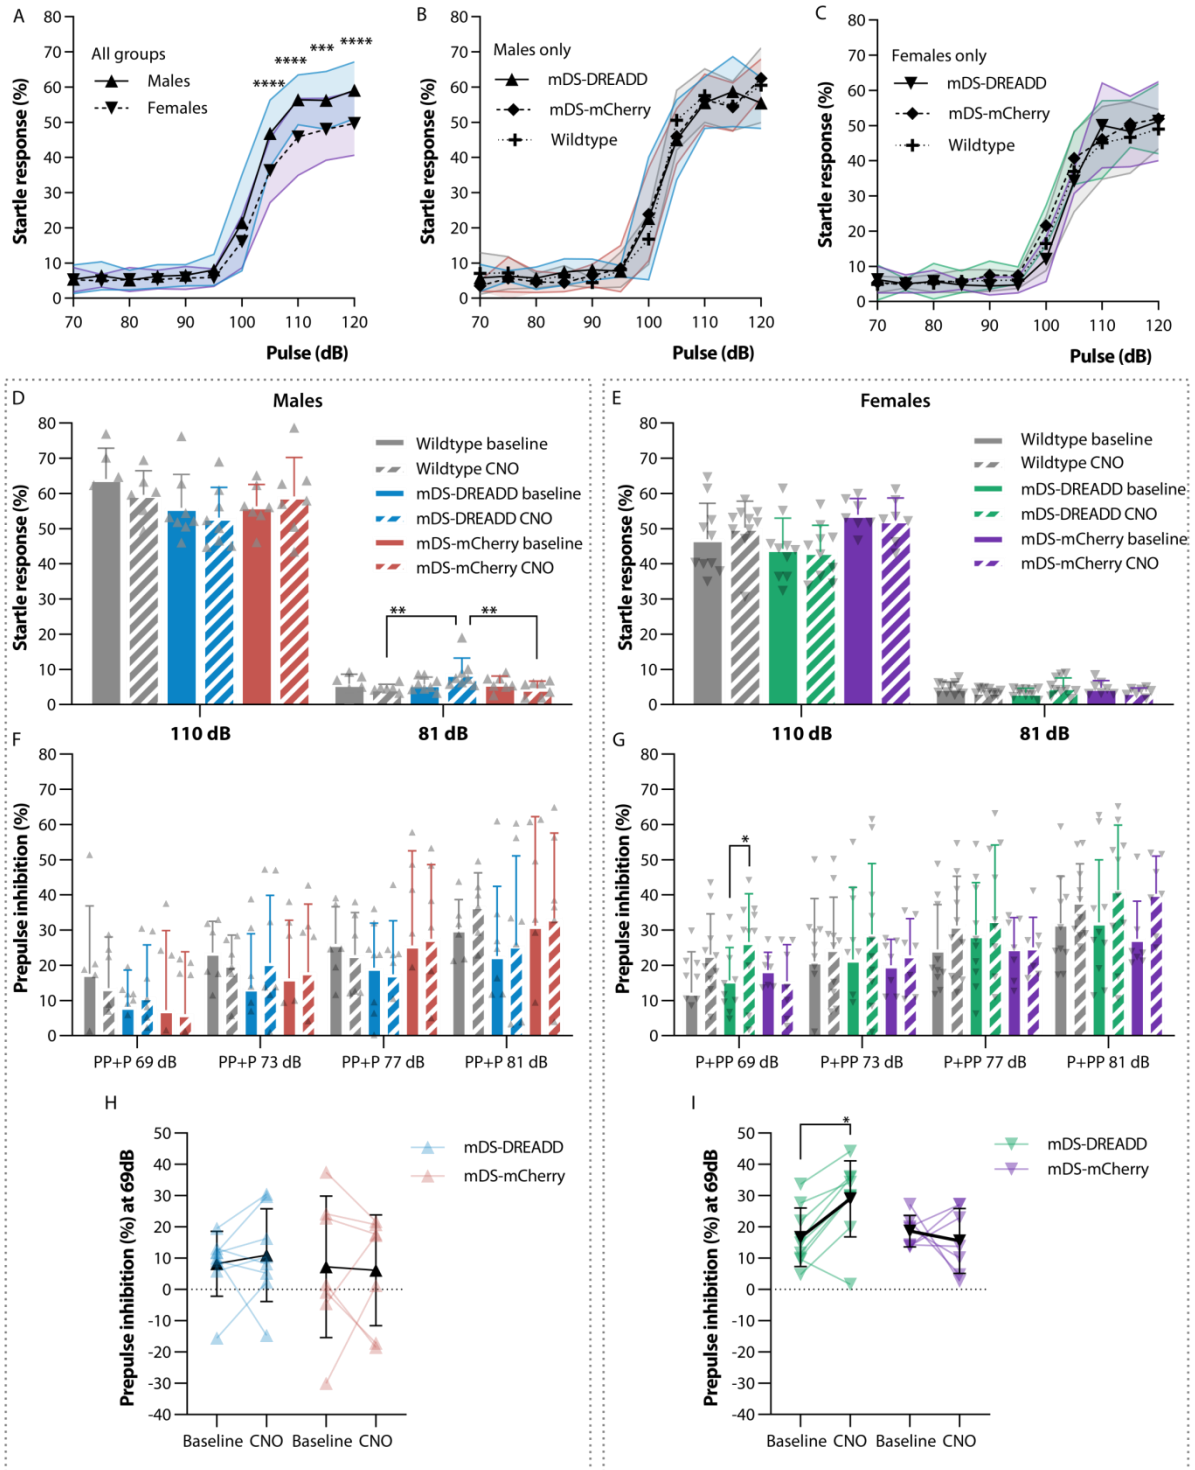

1  
 2 Figure 3: Acoustic startle response and prepulse inhibition. A, B, C) Startle response to various volumes of pulses. D,  
 3 E) Startle response and effect of mDS-DREADD activation at high volume (110 dB) pulses and low volume (81 dB)  
 4 prepulses. F, G) PPI as a result of prepulse intensities, negative PPI values are not shown in F and G to simplify the  
 5 graph but were included in the statistical analysis. H, I) All PPI values at the lowest prepulse intensity (69 dB) pre and  
 6 post CNO treatment to activate the nigro-striatal dopaminergic pathway. (♂ = ▲) (♀ = ▼).

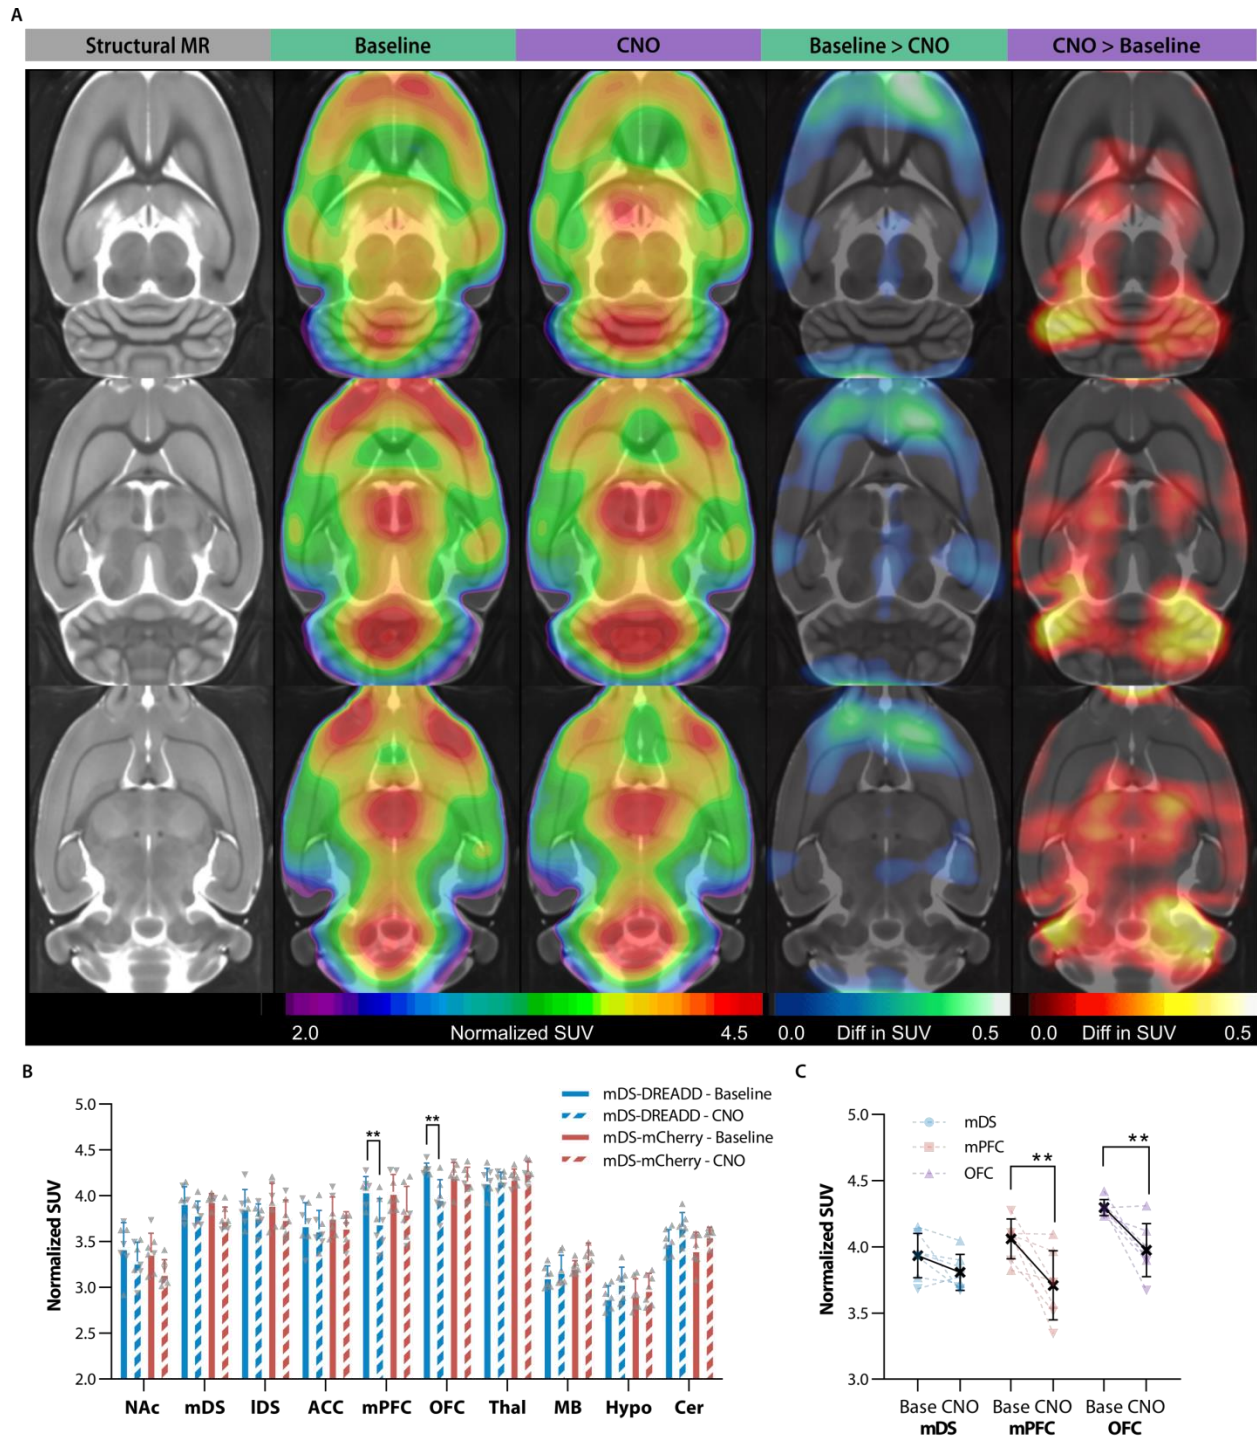

1  
 2 Figure 4: [<sup>18</sup>F]FDG images. A) [<sup>18</sup>F]FDG uptake in mDS-DREADD animal at baseline and after chemogenetic (CNO)  
 3 stimulation (rainbow color), lower metabolic activity (blue color), higher metabolic activity (red color). B) Regional  
 4 standard uptake values at all conditions and C) significant changes and individual animals in mDS, mPFC and OFC.  
 5 (♂ = ▲) (♀ = ▼). Nucleus Acumbens (NAc), medial Dorsal Striatum (mDS), lateral Dorsal Striatum (IDS), Anterior  
 6 Cingulate Cortex (ACC), medial Prefrontal Cortex (mPFC), Orbito Frontal Cortex (OFC), Thalamus (Thal), the  
 7 midbrain including ventral tegmental area and substantia nigra (MB), Hypothalamus (Hyp) and Cerebellum (Cer).

1

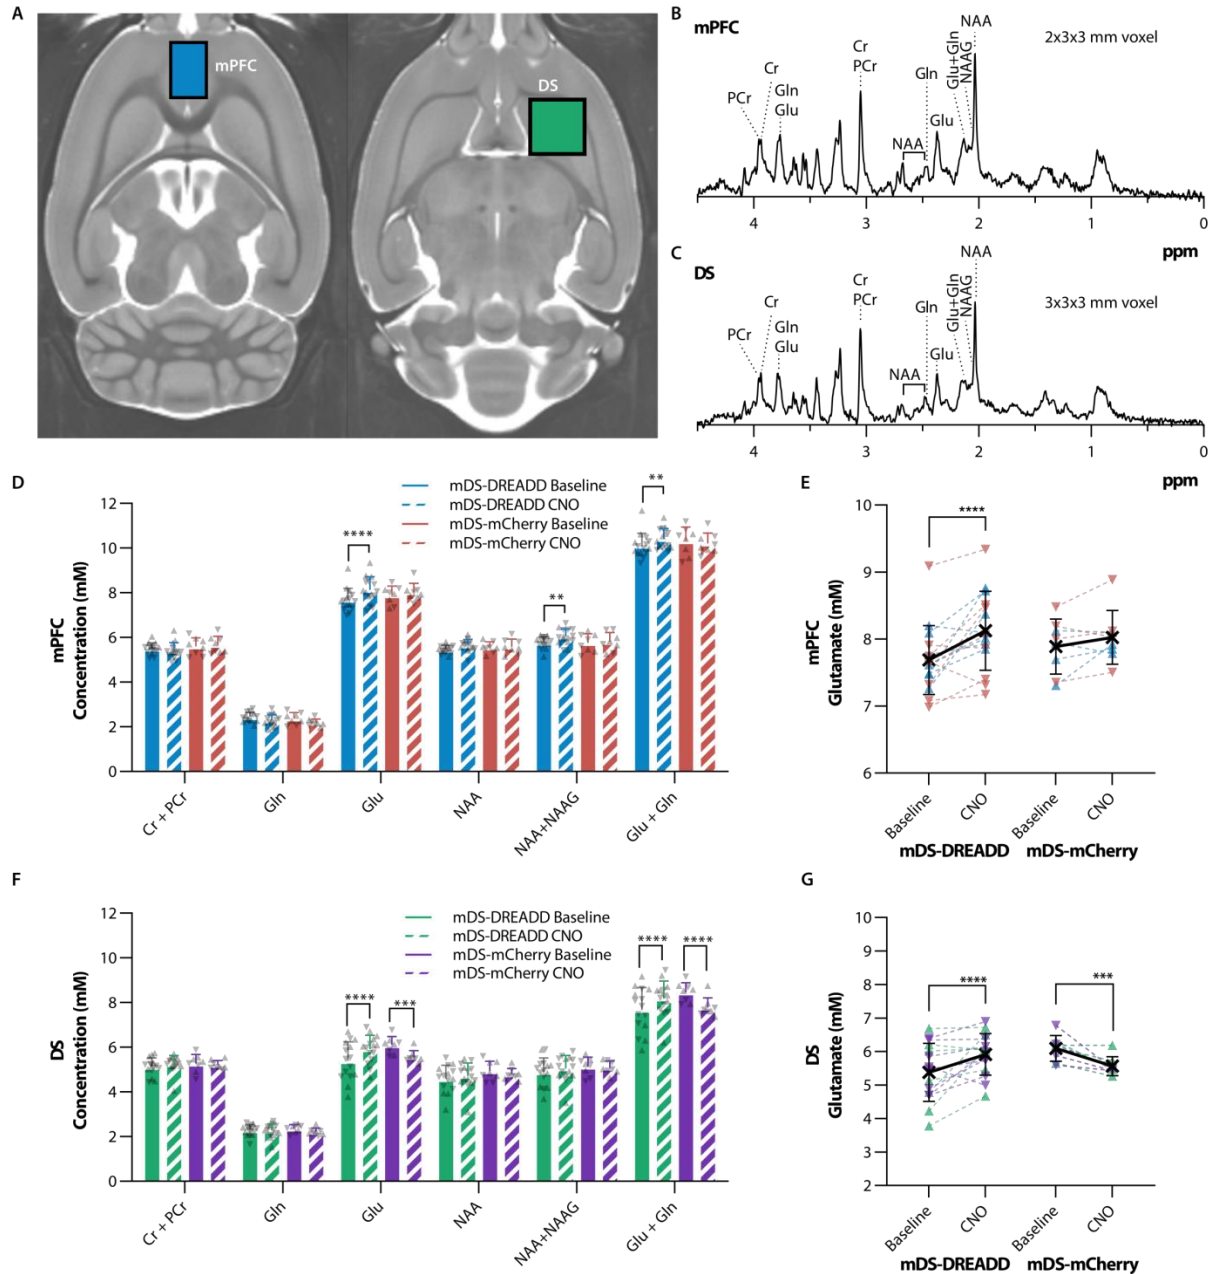

2

3 Figure 5: MR spectroscopy of neurochemicals in mDS-DREADD and mDS-mCherry animals. A) Voxel placement  
 4 in mPFC (blue voxel) and DS (green voxel). B,C) Sample spectra from the mPFC and DS. D,F) Neurochemical  
 5 concentrations in the mPFC in all conditions, E,G) significant changes in glutamate on the individual level. (♂ = ▲)  
 6 (♀ = ▼). Medial Prefrontal Cortex (mPFC), Dorsal Striatum (DS), Creatine (Cr), Phosphocreatine (PCr), Glutamine  
 7 (Gln), Glutamate (Glu), N-acetyl-aspartate (NAA) and N-acetyl-aspartatylglutamate (NAAG).
